# Supplementary material for: Thermal stability of emerging N6-type energetic materials: kinetic modeling of simultaneous thermal analysis data to explain sensitivity trends
Source: Royal Society of Chemistry journal article supplement (doi:10.1039/d2cp05759j), 2023-01-01
Supplement: d2cp05759j1.pdf [file d2cp05759j1.pdf]

**Supporting information**

---

**Thermal Stability of Emerging N6-type Energetic  
Materials: Kinetic Modeling of Simultaneous  
Thermal Analysis Data to Explain Sensitivity Trends**

Nikita V. Muravyev,<sup>a</sup> Dmitry K Pronkin,<sup>a</sup> Michael S. Klenov,<sup>b</sup> Alexey A. Voronin,<sup>b</sup> Igor L. Dalinger,<sup>b</sup> Konstantin A. Monogarov<sup>a</sup>

<sup>a</sup> Semenov Federal Research Center for Chemical Physics, Russian Academy of Sciences, 4 Kosygina Str., 119991 Moscow, Russia

<sup>b</sup> Zelinsky Institute of Organic Chemistry, Russian Academy of Sciences, 119991 Leninsky Prospect 47 Moscow, Russia

---

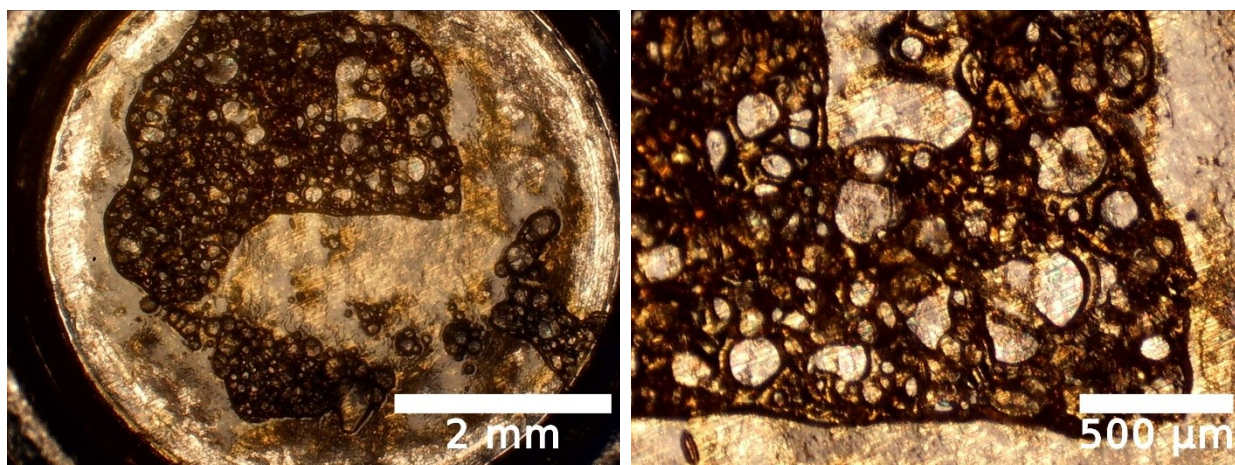

**Figure S1.** Optical image of the sample **1** heated at  $5 \text{ K min}^{-1}$  rate up to an endothermic peak and quenched to room temperature: photo of the whole crucible and magnified view.

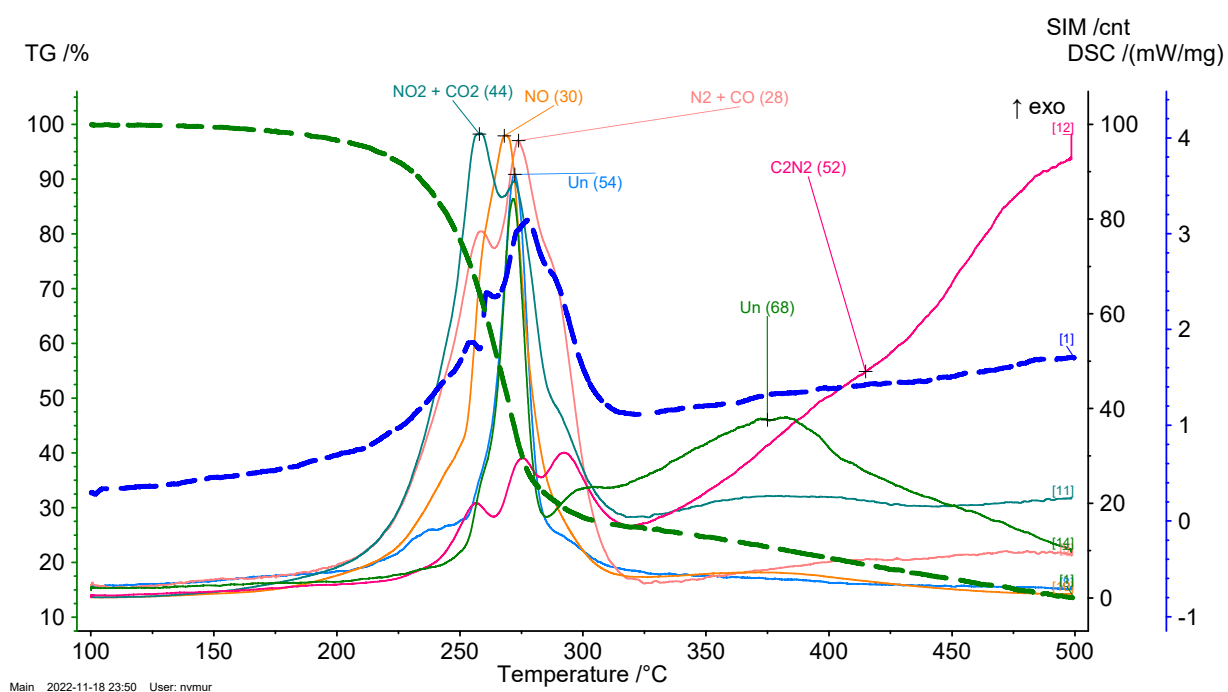

**Figure S2.** Thermal analysis of **2** heated at  $5 \text{ K min}^{-1}$  rate: mass loss (TG, green dashed curve), heat flow (DSC, blue dashed curve), and traces of the selected mass numbers via the mass spectrometric analysis of the evolved gases. Traces of the characteristic lines are given for main products ( $\text{N}_2$ ,  $\text{NO}$ ,  $\text{N}_2\text{O}$ ,  $\text{NO}_2$ ,  $\text{C}_2\text{N}_2$ ,  $\text{CO}_2$ , and unidentified species with  $m/z = 68$  and  $54$ ). Traces are plotted not in scale to allow observing their temporal behavior.

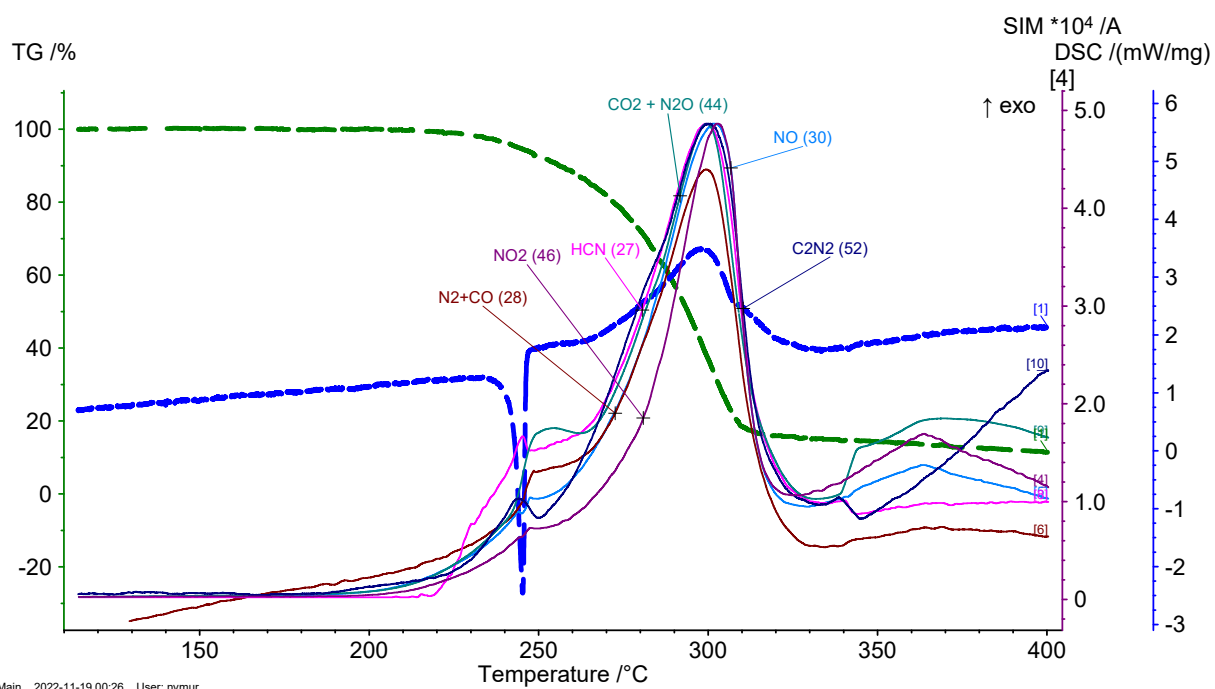

**Figure S3.** Thermal analysis of **3** heated at  $5 \text{ K min}^{-1}$  rate: mass loss (TG, green dashed curve), heat flow (DSC, blue dashed curve), and traces of the selected mass numbers via the mass spectrometric analysis of the evolved gases. Traces of the characteristic lines are given for main products ( $\text{N}_2$ ,  $\text{NO}$ ,  $\text{N}_2\text{O}$ ,  $\text{NO}_2$ ,  $\text{C}_2\text{N}_2$ ,  $\text{CO}_2$ ). Traces are plotted not in scale to allow observing their temporal behavior.

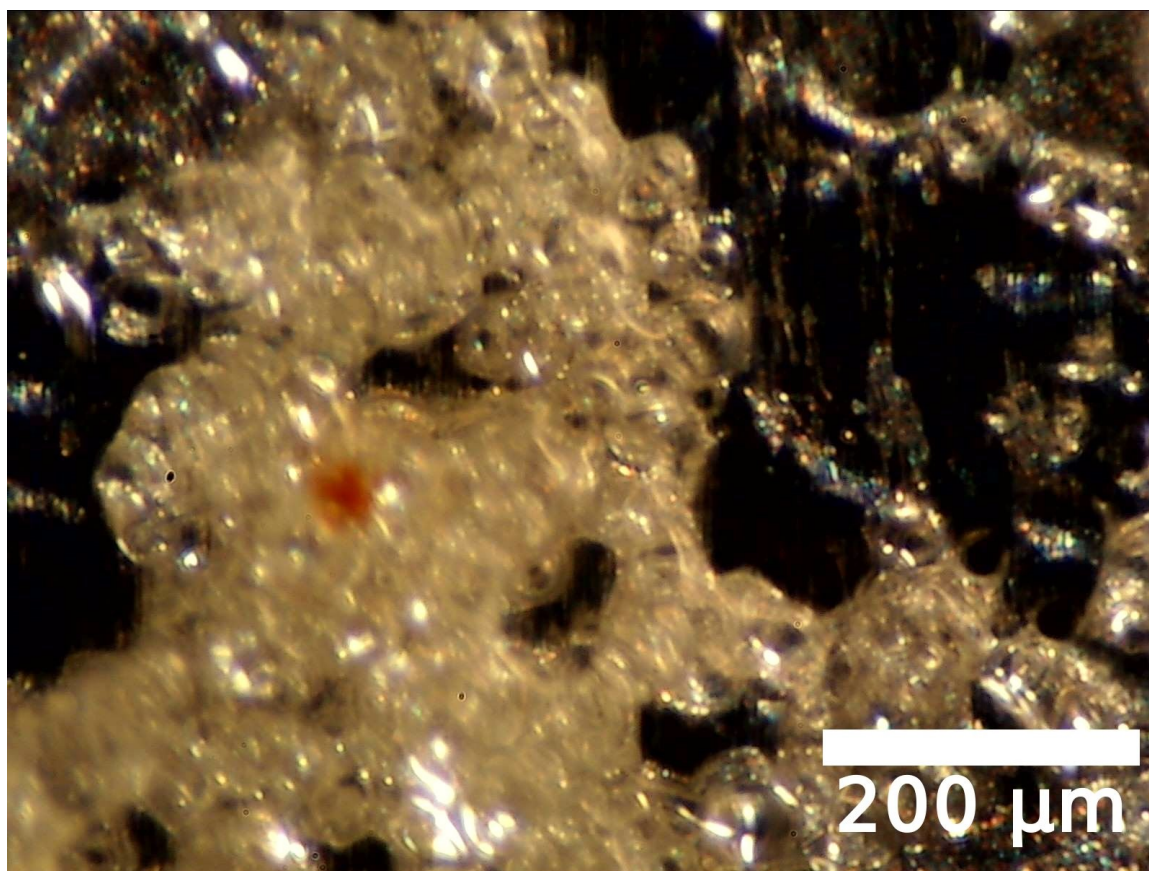

**Figure S4.** Optical image of the sample **5** heated at  $5 \text{ K min}^{-1}$  rate up to an endothermic peak and quenched to room temperature.

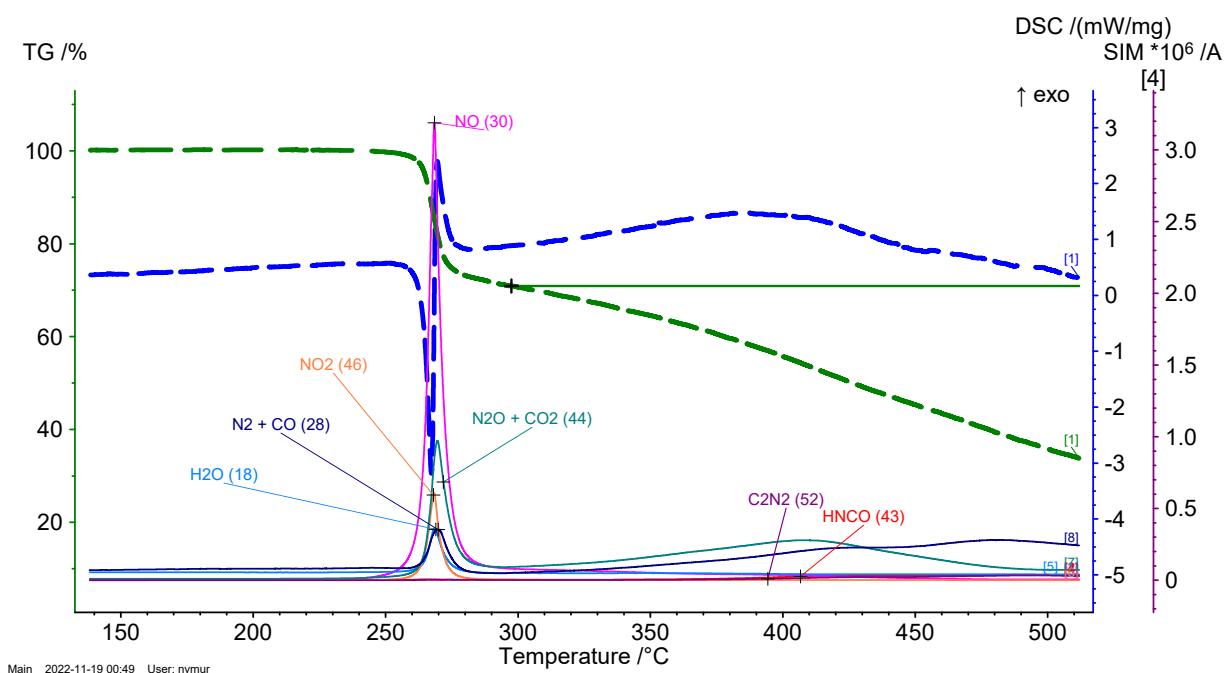

**Figure S5.** Thermal analysis of **5** heated at  $5 \text{ K min}^{-1}$  rate: mass loss (TG, green dashed curve), heat flow (DSC, blue dashed curve), and traces of the selected mass numbers via the mass spectrometric analysis of the evolved gases. Traces of the characteristic lines are given for main products ( $\text{N}_2$ ,  $\text{NO}$ ,  $\text{N}_2\text{O}$ ,  $\text{NO}_2$ ,  $\text{C}_2\text{N}_2$ ,  $\text{CO}_2$ ). Traces are plotted not in scale to allow observing their temporal behavior.

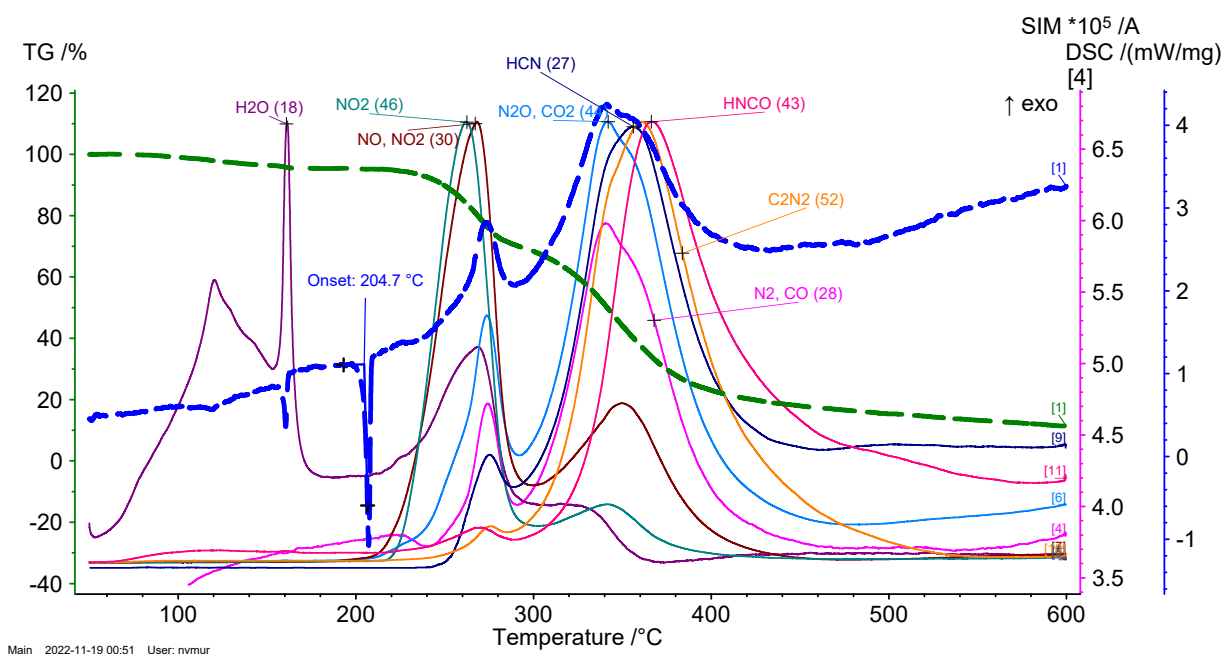

**Figure S6.** Thermal analysis of **4** heated at  $5 \text{ K min}^{-1}$  rate: mass loss (TG, green dashed curve), heat flow (DSC, blue dashed curve), and traces of the selected mass numbers via the mass spectrometric analysis of the evolved gases. Traces of the characteristic lines are given for main products ( $\text{NO}$ ,  $\text{N}_2\text{O}$ ,  $\text{NO}_2$ ,  $\text{H}_2\text{O}$ ,  $\text{HCN}$ ,  $\text{HCNO}$ ,  $\text{C}_2\text{N}_2$ ,  $\text{CO}_2$ ). Traces are plotted not in scale to allow observing their temporal behavior.

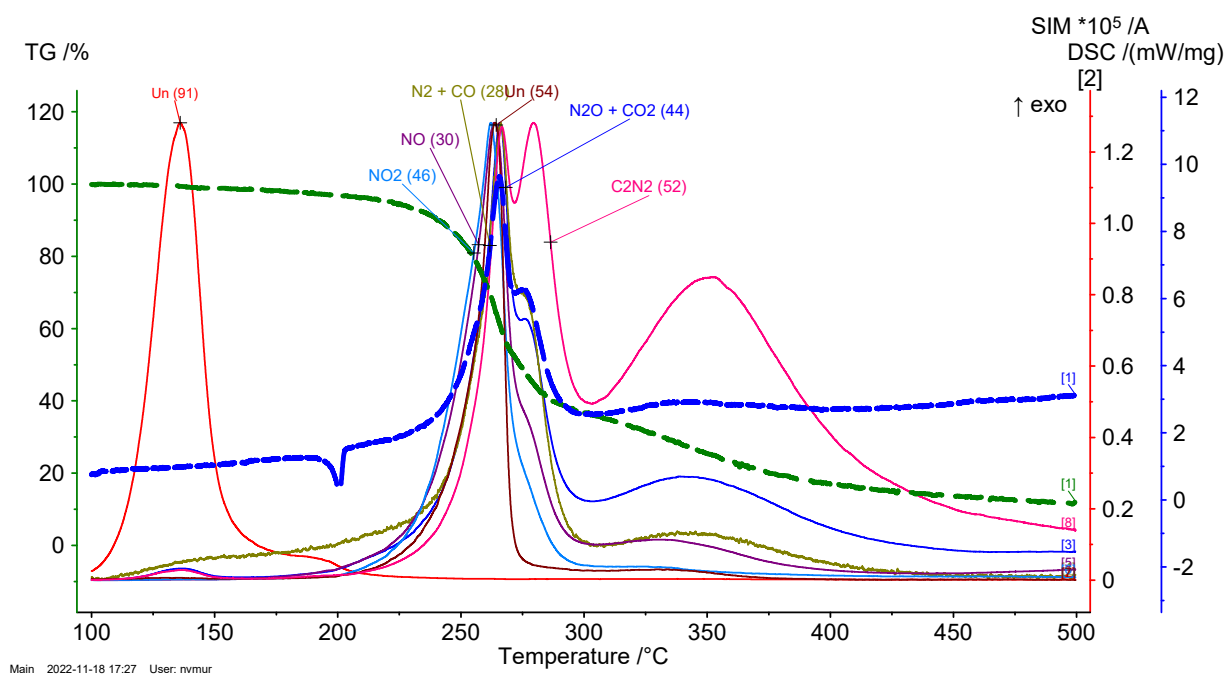

**Figure S7.** Thermal analysis of **1** heated at  $5 \text{ K min}^{-1}$  rate: mass loss (TG, green dashed curve), heat flow (DSC, blue dashed curve), and traces of the selected mass numbers via the mass spectrometric analysis of the evolved gases. Traces of the characteristic lines are given for main products ( $\text{N}_2$ , NO,  $\text{N}_2\text{O}$ ,  $\text{NO}_2$ ,  $\text{C}_2\text{N}_2$ ,  $\text{CO}_2$ , and unidentified species with  $m/z = 91$  and  $54$ ). Traces are plotted not in scale to allow observing their temporal behavior.
